# Supplementary material for: Perfusion-based ex vivo culture of frozen ovarian cancer tissues with preserved tumor microenvironment
Source: NPJ Precis Oncol. 2025 May 23;9:152. doi: 10.1038/s41698-025-00941-6 (PMC12102267; doi:10.1038/s41698-025-00941-6)
Supplement: Supplementary file 2 — Supplementary tables [file 41698_2025_941_MOESM2_ESM.xlsx]

## Sheet: Table S1
Supplementary Table 1. Serous ovarian cancer patient samples and respective analyses. OC-ovarian cancer, OV-ovary, OM-omental meatastasis, DM-diaphragmatic metastasis, S vs. P-static versus perfused, Fresh vs. SF-fresh versus slow frozen, QC-quality check, SCT-standard chemotherapy experimental setting, NGS-next generation sequencing gene profiling.
Patient ID	Diagnosis	Tissue origin	Experimental setting	Analysis type	Figure/Table
OC-1	High-grade serous OC	OM	S vs. P, Fresh vs. SF; QC	Histology	Figure1; Figure 2; Suppl. Figure 2; Suppl. Figure 4; Figure 3
OC-2	High-grade serous OC	OV	S vs. P; Fresh vs. SF	Histology	Figure1; Figure 2; Suppl. Figure 2; Suppl. Figure 4; Figure 3
OC-3	Low-grade serous OC	OV	S vs. P; Fresh vs. SF	Histology	Figure1; Figure 2; Suppl. Figure 2; Suppl. Figure 4; Figure 3
OC-4	High-grade serous OC	OM	S vs. P; Fresh vs. SF	Histology	Figure1; Figure 2; Suppl. Figure 2; Suppl. Figure 4; Suppl. Figure 5; Suppl. Figure 6; Figure 3
OC-5	High-grade serous OC	DM	S vs. P, Fresh vs. SF; QC	Histology	Figure1; Figure 2; Suppl. Figure 2; Suppl. Figure 4; Figure 3; Suppl. Figure 5
		OV	Fresh vs. SF; QC; SCT	Histology	Figure 2; Suppl. Figure 2; Suppl. Figure 4; Figure 3; Figure 5; Suppl. Figure 8
OC-6	High-grade serous OC	OM	Fresh vs. SF; QC	Histology	Figure 2; Suppl. Figure 2; Suppl. Figure 4
OC-7	High-grade serous OC	OV	Fresh vs. SF; QC	Histology	Figure 2; Suppl. Figure 2; Suppl. Figure 4; Figure 3; Suppl. Figure 5
OC-8	High-grade serous OC	OV	Fresh vs. SF; QC	Histology, NGS	Figure 2; Suppl. Figure 2; Suppl. Figure 4; Suppl. Table 2
OC-9	High-grade serous OC	OV	Fresh vs. SF; QC	NGS	Figure 2; Suppl. Table 2
OC-10	High-grade serous OC	OM	Fresh vs. SF	NGS	Figure 2; Suppl. Table 2
OC-11	High-grade serous OC	OV	Fresh vs. SF; QC	Histology, NGS	Figure 2; Suppl. Figure 2; Suppl. Figure 4; Suppl. Table 2
	High-grade serous OC	OM	Fresh vs. SF; QC	Histology	Figure 2; Suppl. Figure 2; Suppl. Figure 4; Figure 3; Suppl. Figure 5
OC-12	High-grade serous OC	OV	Fresh vs. SF	NGS	Figure 2; Suppl. Figure 4; Suppl. Table 2
OC-13	High-grade serous OC	OM	Fresh vs. SF; QC	Histology	Figure 2; Suppl. Figure 2
OC-14	High-grade serous OC	OM	Fresh vs. SF; QC; SCT	Histology	Figure 2; Suppl. Figure 2; Suppl. Figure 4; Figure 3; Suppl. Figure 5; Suppl. Figure 6; Figure 5; Suppl. Figure 8
OC-15	High-grade serous OC	OV	Fresh vs. SF; QC; SCT	Histology	Figure 2; Suppl. Figure 2; Suppl. Figure 4; Figure 3; Figure 5; Suppl. Figure 8
OC-16	High-grade serous OC	OV	Fresh vs. SF; QC; SCT	Histology	Figure 2; Suppl. Figure 2; Suppl. Figure 4; Figure 3; Figure 5; Suppl. Figure 8
OC-17	High-grade serous OC	OM	Fresh vs. SF; QC; SCT	Histology	Figure 2; Suppl. Figure 2; Suppl. Figure 4; Figure 3; Suppl. Figure 5; Figure 5; Suppl. Figure 8

## Sheet: Table S2
Supplementary table 2. Pathogenic mutations identified in OC specimens cultured in UCUP bioreactor
Patient ID	TP53	KRAS	PIK3CA	SMAD4
OC-8	p.W53fs*70
OC-9	p.R249G		p.H1047R
OC-10		p.G12D		p.L540R
OC-11	p.R181P
OC-12	p.F109fs*38

## Sheet: Table S3
Supplementary table 3. Conditions used for immunofluorescence
Marker	Antibody	Clone	Dilution	Antigen retrieval	Incubation	Secondary antibody/dilution/incubation
Ki67	Dako #M7240​	MIB-1	1:100	HMAR 10 mM Tris, 1 mM EDTA, pH 8	RT, 1h	488 Goat anti Mouse (Thermo Fisher Scientific #A-11017)/1:750/RT, 3h
ECAD	Cell signaling #3195S	24E10	1:200	HMAR 10 mM Sodium citrate, pH 6	RT, 1h or +4, O/N	647 Goat anti Rabbit (Thermo Fisher Scientific #A-21244)/1:750/RT, 3h
αSMA​	Dako #M0851​	M0851	1:700	HMAR 10 mM Sodium citrate, pH 6	RT, 1h	594 Goat anti Mouse (Thermo Fisher Scientific #A-11005)/1:750/RT, 1h
CD31​	Invitrogen #25-0311-82	390	1:100	HMAR 10 mM Sodium citrate, pH 6	+4, O/N	488 Goat anti Rabbit (Thermo Fisher Scientific #A-11034)/1:750/RT, 1h
cC3​	Cell signaling #9661S	polyclonal	1:200	HMAR 10 mM Sodium citrate, pH 6	+4, O/N	488 Goat anti Mouse (Thermo Fisher Scientific #A-11017)/1:750/3h

## Sheet: Table S4
Supplementary table 4. Genomic regions of the laboratory-developed multi-gene NGS panel
Gene​	RefSeq​	Genomic Regions​
BRAF​	NM_004333.6​	Exons 11, 15​
CTNNB1​	NM_001904.4​	Exons 3, 7, 8​
DICER1​	NM_030621.4​	Exons 10, 21, 26, 27, 29​
DPYD​	NM_000110.4​	DPYD*2A, DPYD*13, DPYD D949V, HapB3​
EGFR​	NM_005228.5​	Exons 18, 19, 20, 21​
EIF1AX​	NM_001412.4​	Exons 1, 2​
GNA11​	NM_002067.5​	Exons 4, 5​
GNAQ​	NM_002072.5​	Exons 4, 5​
GNAS​	NM_000516.7​	Exons 8, 9​
H3F3A​	NM_001379043.1​	Exon 1​
HRAS​	NM_001130442.2​	Exons 2, 3, 4​
IDH1​	NM_005896.4​	Exon 4​
IDH2​	NM_002168.4​	Exon 4​
KIT​	NM_000222.3​	Exons 8, 9, 11, 13, 17​
KRAS​	NM_033360.4​	Exons 2, 3, 4​
MED12​	NM_005120.3​	Exons 1, 2​
MET​	NM_001127500.3​	Exons 2, 14​
NRAS​	NM_002524.5​	Exons 2, 3, 4​
PDGFRa​	NM_006206.6​	Exons 12, 14, 18​
PIK3CA​	NM_006218.4​	Exons 8, 10, 21​
PTEN​	NM_000314.8​	Exon 5​
RET​	NM_020975.6​	Exons 5, 8, 10, 11, 13, 14, 15, 16​
RNF43​	NM_017763.6​	Exons 2-9​
SMAD4​	NM_005359.6​	Exons 2-12​
TERT​	NM_198253.3​	Promoter region​
TP53​	NM_000546.6​	Exons 2-11​
TSHR​	NM_000369.5​	Exons 1-10​
VHL​	NM_000551.4​	Exons 1-3​

## Sheet: Table S5
Supplementary table 5. Supplements used for Advanced DMEM/F12 medium, containing 1%Glutamax, 1%Pen/Strep, 10%FBS.
Supplements	Concentration	Company, Cat. n.
Hepes	10 mM	Gibco, #15630-056
Primocin	0.1 mg/mL	Invitrogen, #ant-pm-05
Human EGF	25 ng/mL	Peprotech, #AF-100-15
Nicotinamide	10 mM	Sigma, #N0636
N-Acetylcysteine (nAc)	1.25 mM	Sigma, #A9165-25G
B27 supplement (50x concentrated)	1x	Invitrogen, #17504044

## Sheet: Table S6
Supplementary table 6. Scripts and Classifiers used for QuPath analysis.
Algorithms	Script for neoplastic cells classification from Haematoxylin and eosin	Pixel classifier Tumor vs stroma
NA	selectAnnotations(); addPixelClassifierMeasurements("Tumour vs stroma", "Tumour vs stroma")	{ "metadata": { "inputPadding": 0, "inputResolution": { "pixelWidth": { "value": 1.7667454340672688, "unit": "µm" }, "pixelHeight": { "value": 1.7667454340672688, "unit": "µm" }, "zSpacing": { "value": 1.0, "unit": "z-slice" }, "timeUnit": "SECONDS", "timepoints": [] }, "inputWidth": 512, "inputHeight": 512, "inputNumChannels": 3, "outputType": "CLASSIFICATION", "outputChannels": [ { "name": "Str…
	Script for OV90 cells nuclei count	Pixel classifier Size classification
StarDist2D	import qupath.ext.stardist.StarDist2D //segment cells selectObjectsByClassification("Tissue"); // Specify the model directory (you will need to change this!) def pathModelOrganoids = 'D:/User_Data/QuPath_folder/scripts/he_heavy_augment.pb' def stardist = StarDist2D.builder(pathModelOrganoids) .threshold(0.5) // Probability (detection) threshold .normalizePercentiles(1, 99) // Percentile normaliza…	{ "object_classifier_type": "OpenCVMLClassifier", "featureExtractor": { "feature_extractor_type": "DefaultFeatureExtractor", "measurements": [ "Area µm^2", "Length µm", "Circularity" ] }, "classifier": { "class": "RTrees", "statmodel": { "opencv_ml_rtrees": { "format": 3, "is_classifier": 1, "var_all": 4, "var_count": 3, "ord_var_count": 3, "cat_var_count": 1, "training_params": { "use_surrogates…
	Script for Ki67+ cells classification and count from Haematoxylin and eosin	Object classifier for ECAD	Object classifier for Ki67
Watershed Cell Detection	setImageType('FLUORESCENCE'); selectAnnotations(); runPlugin('qupath.imagej.detect.cells.WatershedCellDetection', '{"detectionImage": "20X DAPI", "requestedPixelSizeMicrons": 0.5, "backgroundRadiusMicrons": 8.0, "medianRadiusMicrons": 0.0, "sigmaMicrons": 1.5, "minAreaMicrons": 10.0, "maxAreaMicrons": 400.0, "threshold": 250.0, "watershedPostProcess": true, "cellExpansionMicrons": 2.0, "includeNu…	{ "object_classifier_type": "SimpleClassifier", "function": { "classifier_fun": "ClassifyByMeasurementFunction", "measurement": "Cytoplasm: Cy5 mean", "pathClassBelow": { "name": "ECAD-", "colorRGB": -65536 }, "pathClassEquals": { "name": "ECAD+", "colorRGB": -1 }, "pathClassAbove": { "name": "ECAD+", "colorRGB": -1 }, "threshold": 80.53976002641907 }, "pathClasses": [ { "name": "ECAD-", "colorRG…	{ "object_classifier_type": "SimpleClassifier", "function": { "classifier_fun": "ClassifyByMeasurementFunction", "measurement": "Nucleus: FITC mean", "pathClassBelow": { "name": "Ki67-", "colorRGB": -16711936 }, "pathClassEquals": { "name": "Ki67+", "colorRGB": -65281 }, "pathClassAbove": { "name": "Ki67+", "colorRGB": -65281 }, "threshold": 845.0 }, "pathClasses": [ { "name": "Ki67-", "colorRGB"…
	Script for ⍺SMA+ cells classification and count	Object classifier for ⍺SMA
StarDist2D	setImageType('FLUORESCENCE'); setChannelNames( 'DAPI', 'FITC', 'Cy5', ) selectAnnotations(); import qupath.ext.stardist.StarDist2D // Specify the model file (you will need to change this!) var pathModel = 'D:/User_Data/Maria/dsb2018_heavy_augment.pb' var stardist = StarDist2D.builder(pathModel) .threshold(0.6) // Probability (detection) threshold .channels('DAPI') // Select detection channel .nor…	{ "object_classifier_type": "OpenCVMLClassifier", "featureExtractor": { "feature_extractor_type": "DefaultFeatureExtractor", "measurements": [ "Detection probability", "Nucleus: Area µm^2", "Nucleus: Length µm", "Nucleus: Circularity", "Nucleus: Solidity", "Nucleus: Max diameter µm", "Nucleus: Min diameter µm", "Cell: Area µm^2", "Cell: Length µm", "Cell: Circularity", "Cell: Solidity", "Cell: Ma…
	Script for cC3+ cells classification and count	Object classifier for cC3
StarDist2D	setImageType('FLUORESCENCE'); setChannelNames( 'DAPI+', 'cC3+', ) selectAnnotations(); import qupath.ext.stardist.StarDist2D // Specify the model file (you will need to change this!) var pathModel = 'D:/User_Data/Maria/dsb2018_heavy_augment.pb' var stardist = StarDist2D.builder(pathModel) .threshold(0.6) // Probability (detection) threshold .channels('DAPI+') // Select detection channel .normaliz…	{ "object_classifier_type": "SimpleClassifier", "function": { "classifier_fun": "ClassifyByMeasurementFunction", "measurement": "Nucleus: cC3+ mean", "pathClassBelow": { "name": "cC3-", "colorRGB": -16776961 }, "pathClassEquals": { "name": "cC3+", "colorRGB": -65281 }, "pathClassAbove": { "name": "cC3+", "colorRGB": -65281 }, "threshold": 504.0 }, "pathClasses": [ { "name": "cC3-", "colorRGB": -1…
	Script for CD45+ cells classification and count
Positive Cell Detection	runPlugin('qupath.imagej.detect.cells.PositiveCellDetection', '{"detectionImageBrightfield": "Hematoxylin OD", "requestedPixelSizeMicrons": 0.5 , "backgroundRadiusMicrons": 20.0, "medianRadiusMicrons": 0.0, "sigmaMicrons": 2.0, "minAreaMicrons": 15.0, "maxAreaMicrons": 200.0, "threshold": 0.03, "maxBackground": 2.5, "watershedPostProcess": true, "excludeDAB": false, "cellExpansionMicrons": 4.0, "…
	Script for PAX8+ nuclei area measurements	Object classifier for PAX8
Cellpose Detection	selectAnnotations() def pathModel = 'cyto2' def cellpose = Cellpose2D.builder( pathModel ) .pixelSize( 0.3 ) // Resolution for detection in um .measureShape() // Add shape measurements .measureIntensity() // Add cell measurements (in all compartments) // Run detection for the selected objects def imageData = getCurrentImageData() def pathObjects = getSelectedObjects() if (pathObjects.isEmpty()) {…	{ "object_classifier_type": "OpenCVMLClassifier", "featureExtractor": { "feature_extractor_type": "DefaultFeatureExtractor", "measurements": [ "Area µm^2", "Length µm", "Circularity", "Solidity", "Max diameter µm", "Min diameter µm", "Hematoxylin: Mean", "Hematoxylin: Median", "Hematoxylin: Min", "Hematoxylin: Max", "Hematoxylin: Std.Dev.", "DAB: Mean", "DAB: Median", "DAB: Min", "DAB: Max", "DAB…

## Sheet: Table S7
Supplementary Table 7. Analysis of nuclear size in PAX8+ tumor cells.
			DIAMETER (µm)					AREA (µm^2)					ROI Samples
			Fresh d0	Fresh S6d	Fresh P6d	SF P6d		Fresh d0	Fresh S6d	Fresh P6d	SF P6d		Fresh d0	Fresh S6d	Fresh P6d	SF P6d
	OC1	MEAN	9.9296	11.4117	12.0623			82.344	106.479	121.438			#VALUE!	#VALUE!	#VALUE!
		SD	2.50005	2.31625	3.04338			40.8934	44.2682	60.8564
		#	1755	286	65			1755	286	65
		MEDIAN	9.88092	11.3409	11.5564			76.6805	101.015	104.889
		MIN	2.59623	4.61473	5.69517			5.2939	16.7256	25.4744
		MAX	23.7505	19.3492	19.5135			443.034	294.047	299.063
	OC2	MEAN	8.52149	8.82573	9.09615			60.3344	65.3545	69.0964			#VALUE!	#VALUE!	#VALUE!
		SD	2.05141	2.31054	2.29135			28.9827	34.8251	34.349
		#	1071	265	377			1071	265	377
		MEDIAN	8.37767	8.57062	8.95267			55.1234	57.6918	62.9499
		MIN	2.7492	3.69874	2.81166			5.9361	10.7448	6.2089
		MAX	16.0388	16.4849	17.7776			202.037	213.432	248.219
	OC3	MEAN	6.92881	7.46806	7.751			39.7784	44.9209	49.1014			#VALUE!	#VALUE!	#VALUE!
		SD	1.6252	1.19429	1.56372			19.1367	15.0779	19.6811
		#	1189	447	461			1189	447	461
		MEDIAN	6.71929	7.30717	7.76748			35.4598	41.9361	47.386
		MIN	2.67692	4.69696	2.9281			5.6281	17.327	6.7338
		MAX	13.6287	12.4675	15.829			145.881	122.081	196.786
	OC4	MEAN	7.79741	8.4557	8.544			50.5129	59.2418	59.8159			#VALUE!	#VALUE!	#VALUE!
		SD	1.87573	1.98558	1.78114			24.1419	28.4056	24.623
		#	1193	318	256			1193	318	256
		MEDIAN	7.63689	8.31591	8.53857			45.8061	54.3141	57.2614
		MIN	2.45217	3.75479	3.73821			4.7227	11.0729	10.9753
		MAX	14.1146	18.2184	14.4452			156.469	260.681	163.885
	OC5 DM	MEAN	7.99562	9.12172	10.1234			54.0837	69.9066	87.6269			#VALUE!	#VALUE!	#VALUE!
		SD	2.22113	2.41092	3.02041			31.8482	39.1869	53.369
		#	2667	553	251			2667	553	251
		MEDIAN	7.80866	8.86901	9.90705			47.8898	61.7789	77.0865
		MIN	2.14098	2.86575	2.69878			3.6001	6.4501	5.7204
		MAX	23.2418	20.9893	20.7357			424.257	346.006	337.697
	OC7	MEAN			12.0731	12.4953				120.335	136.505				#VALUE!	#VALUE!
		SD			2.74233	4.24742				55.8637	89.8243
		#			116	49				116	49
		MEDIAN			12.0383	11.9708				113.822	112.548
		MIN			6.52673	4.4002				33.4566	15.2067
		MAX			20.4753	22.7549				329.269	406.669
	OC11	MEAN			7.80432	8.25361				51.5204	57.4321				#VALUE!	#VALUE!
		SD			2.16707	2.24079				28.9983	31.1057
		#			813	273				813	273
		MEDIAN			7.60386	7.95029				45.4107	49.6427
		MIN			2.25837	3.57513				4.0057	10.0386
		MAX			17.0094	15.0631				227.231	178.205
	OC14	MEAN				7.28731					44.9569					#VALUE!
		SD				2.03501					24.3344
		#				778					778
		MEDIAN				7.27049					41.5162
		MIN				2.14047					3.5984
		MAX				14.0423					154.87
	OC15	MEAN				10.5551					91.4545					#VALUE!
		SD				2.24584					39.3359
		#				521					521
		MEDIAN				10.4035					85.0052
		MIN				5.07828					20.2546
		MAX				20.4374					328.052
	OC16	MEAN				9.93599					82.3242					#VALUE!
		SD				2.47102					41.0154
		#				539					539
		MEDIAN				9.62224					72.718
		MIN				2.79931					6.1545
		MAX				17.9956					254.344
	OC17	MEAN				7.55903					47.1055					#VALUE!
		SD				1.68562					21.3567
		#				772					772
		MEDIAN				7.50488					44.2361
		MIN				2.6118					5.3576
		MAX				14.6364					168.252
	OC5 OV	MEAN				9.02898					68.6707					#VALUE!
		SD				2.43398					37.0165
		#				472					472
		MEDIAN				9.04524					64.2584
		MIN				3.05641					7.3369
		MAX				18.4281					266.718
